# Supplementary material
Source: HighWire-hosted journal article supplement (https://bmjopen.bmj.com/content/10/10/e036881)
Supplement: inline-supplementary-material-1 [file inline-supplementary-material-1.pdf]

## AGT-Reha – Exercise Plan

### 1. Exercise ‘Flieger’

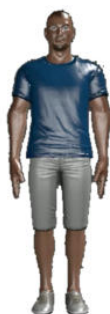

SP

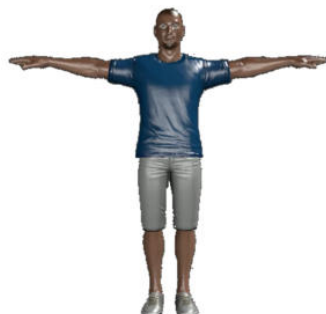

EP

**Legend:**

SP: Starting position

EP: End position

### 2. Exercise ‘Ahnungslos’

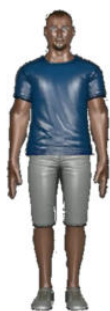

SP

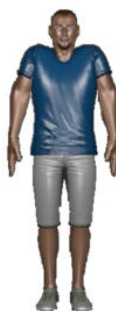

EP

### 3. Exercise ‘Hurra’

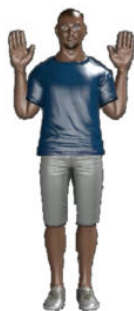

SP

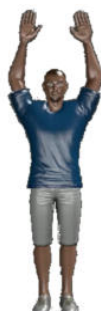

EP

#### 4. Exercise 'Applaus'

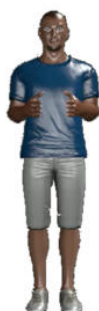

SP

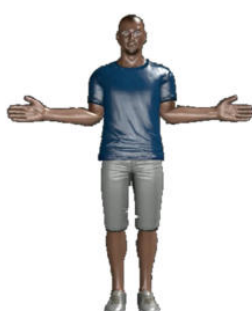

EP

---

#### 5. Exercise 'Butterfly'

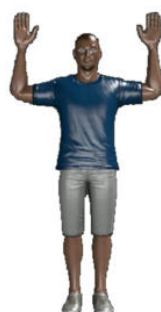

SP

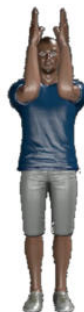

EP

---

#### 6. Exercise 'Helau (rechts)'

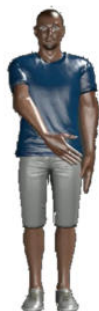

SP

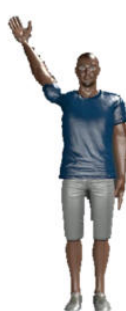

EP

---

#### 7. Exercise 'Helau (links)'

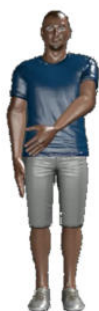

SP

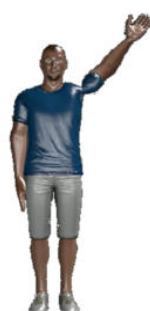

EP

**8. Exercise 'Laola'**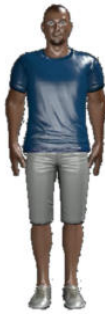

SP

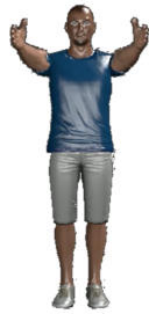

EP

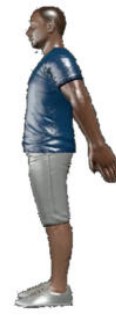

SP sideways

**9. Exercise 'Heber'**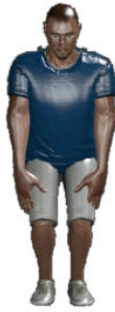

SP

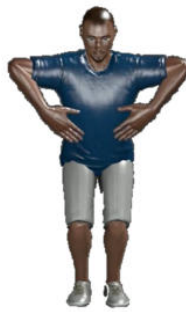

EP

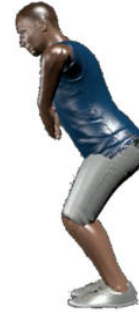

EP sideways

**10. Exercise 'Winkekatze'**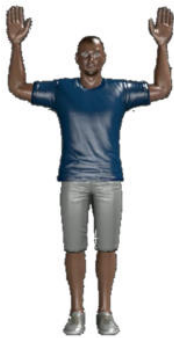

SP

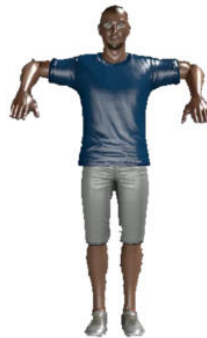

EP
