# Supplementary material
Source: HighWire-hosted journal article supplement (https://bmjopen.bmj.com/content/10/10/e036881)
Supplement: inline-supplementary-material-2 [file inline-supplementary-material-2.pdf]

Patienten-ID:

Datum:

Name des Ausfüllenden: \_\_\_\_\_

AGT-Reha-WK Studie

Messzeitpunkt:

## Fragebogen zur Erhebung der Verstetigung des Trainings

### Abschlussfragebogen

#### 1. Wie häufig haben Sie während der Heimtrainingsphase durchschnittlich mit AGT-Reha trainiert / die Medizinische Trainingstherapie in Anspruch genommen?

- ☐ 2x täglich    ☐ 1x täglich    ☐ 2x pro Woche    ☐ 1x pro Woche  
☐ alle 2 Wochen    ☐ weniger als alle 2 Wochen    ☐ Sonstiges: \_\_\_\_\_

#### 2. Hat die Trainingshäufigkeit im Verlauf der Heimtrainingsphase abgenommen?

- nicht                      wenig                      mittel                      ziemlich                      sehr  
☐                              ☐                              ☐                              ☐                              ☐

#### 2.1 Falls die Trainingshäufigkeit nachgelassen hat, warum?

(Mehrfachantworten möglich)

- ☐ Mir fehlte die Motivation die Übungen weiterhin auszuführen.  
☐ Ich hab nicht mehr so viel Zeit gehabt.  
☐ Ich hatte / habe keine Beschwerden mehr.  
☐ Ich empfand die Übungen nach einiger Zeit als langweilig.  
☐ Sonstige Gründe: \_\_\_\_\_

#### 3. Haben Sie während der Heimtrainingsphase andere Trainingseinheiten zur Verbesserung Ihrer Schulterbeschwerden ausgeführt?

- ☐ Ja    ☐ Nein    ☐ keine Angabe

#### 3.1 Falls ja, welche zusätzlichen Trainingseinheiten haben Sie ausgeführt?

(Mehrfachantworten möglich)

- ☐ Funktionstraining (z.B. Krankengymnastik, Ergotherapie...)  
☐ Gerätetraining im Fitnessstudio  
☐ Fitnesskurs  
☐ Schwimmen  
☐ Zusätzliches Training zu Hause (mit und ohne Geräte)  
☐ Sonstiges Training: \_\_\_\_\_
