# Supplementary material
Source: HighWire-hosted journal article supplement (https://bmjopen.bmj.com/content/10/10/e036881)
Supplement: inline-supplementary-material-3 [file inline-supplementary-material-3.pdf]

Patienten-ID:

AGT-Reha-WK Studie

Datum:

Messzeitpunkt:

Name des Ausfüllenden: \_\_\_\_\_

## Fragebogen zur Erhebung der Nachhaltigkeit der Behandlung

### Katamnese-Fragebogen

**1. Haben Sie nach Beendigung des Trainings mit AGT-Reha / der Medizinischen Trainingstherapie weiterhin eigenverantwortlich die dort erlernten Übungen ausgeführt?**

Ja     Nein     teilweise     keine Angabe

#### Falls ja, ...

**1.1. Wie häufig haben Sie die Übungen durchgeführt?**

2x täglich     1x täglich     2x pro Woche     1x pro Woche  
 weniger als 1x pro Woche     Sonstiges: \_\_\_\_\_

**1.2. Warum haben Sie das Training eigenverantwortlich fortgesetzt?**

*(Mehrfachantworten möglich)*

- Das Training ist für mich über den Verlauf zur Gewohnheit geworden.
- Intrinsische Motivation / Eigenmotivation (MTT, Training mit AGT-Reha zeigte Verbesserung der Beschwerden)
- Extrinsische Motivation / Motivation durch Andere
- Ich habe weiterhin Beschwerden / die Beschwerden sind zurückgekommen (Schmerz, Einschränkung der Beweglichkeit).
- Sonstiges: \_\_\_\_\_

#### Falls nein, ...

**1.1 Hätten Sie das Training gerne fortgesetzt? (z.B. bei mehr Zeit)**

Ja     Nein     keine Angabe

**1. 2 Warum haben Sie das Training nicht fortgesetzt?**

*(Mehrfachantworten möglich)*

- Mir fehlt die Motivation die Übungen weiterhin auszuführen.
- Ich hab nicht genügend Zeit.
- Ich habe keine Beschwerden mehr.
- Ich empfinde die Übungen als langweilig.
- Sonstige Gründe: \_\_\_\_\_

Patienten-ID:

AGT-Reha-WK Studie

Datum:

Messzeitpunkt:

Name des Ausfüllenden: \_\_\_\_\_

**2. Haben Sie nach Beendigung des Trainings mit AGT-Reha / der Medizinischen Trainingstherapie eine andere Form des Trainings zur Verbesserung Ihrer Schulterbeschwerden ausgeführt?**

Ja     Nein     keine Angabe

**Falls ja, ...**

**2.1 Was für ein Training haben Sie zur Verbesserung Ihrer Schulterbeschwerden ausgeführt?**

*(Mehrfachantworten möglich)*

- Funktionstraining (z.B. Krankengymnastik, Ergotherapie...)
- Eigenfinanzierte MTT
- Gerätetraining im Fitnessstudio
- Fitnesskurs
- Schwimmen
- Eigenverantwortliches Training zu Hause (mit und ohne Geräte)
- Sonstiges Training: \_\_\_\_\_

**2.2 Wie häufig haben Sie ihr Training durchgeführt?**

- 2x täglich     1x täglich     2x pro Woche     1x pro Woche
- weniger als 1x pro Woche     Sonstiges: \_\_\_\_\_
